# Supplementary material for: Cognitive Dysfunctions Measured with the MCCB in Deficit and Non-Deficit Schizophrenia
Source: MDPI journal article supplement (doi:10.3390/jcm12062257), 2023-03-14
Supplement: s1 [file s1]

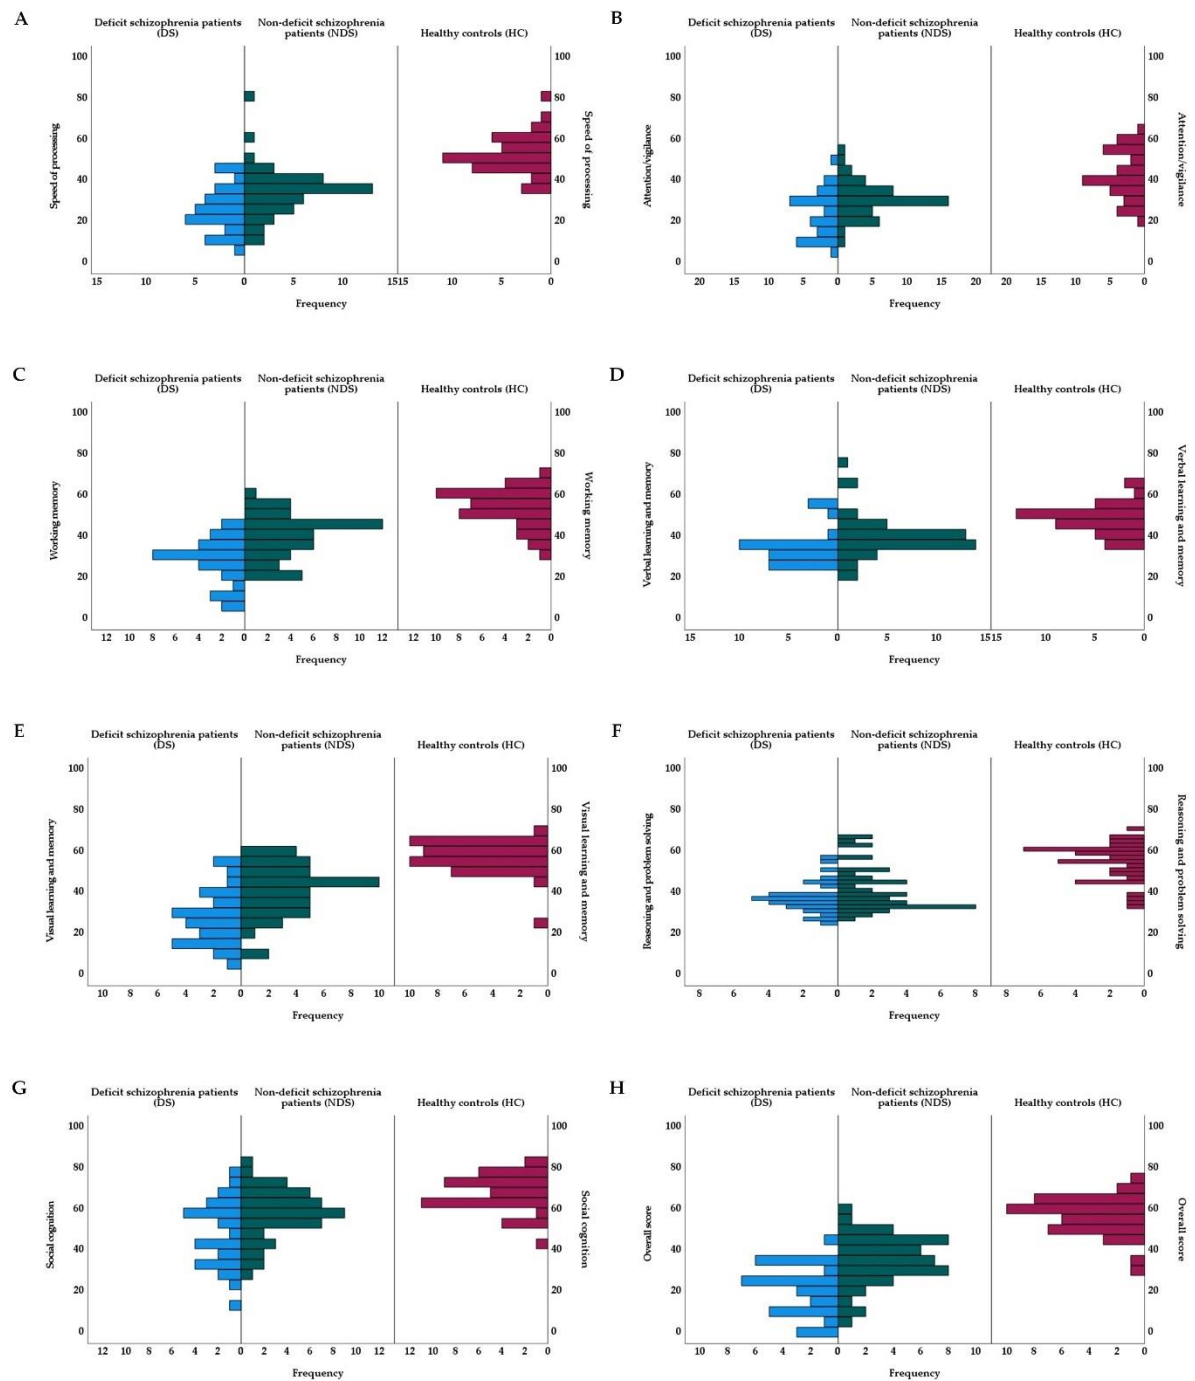

**Figure S1.** Distributions of the samples on cognitive functions from three groups – untransformed T-scores (MCCB: (A) = speed of processing; (B) = attention/vigilance; (C) = working memory; (D) = verbal learning and memory; (E) = visual learning and memory; (F) = reasoning and problem solving; (G) = social cognition, and (H) = overall score). MCCB = Measurement and Treatment Research to Improve Cognition in Schizophrenia.
